# Supplementary material
Source: PubMed Central journal article supplement (PMC4407861)

## SUPPLEMENTARY DATA

### SUPPLEMENTARY MATERIAL

**Caco-2 cell culture with GLP-1(1-37) and GLP-1(7-37) and ELISA.** For co-culturing, 80% confluent monolayers of Caco-2 cells in 12-well plates were covered with 1 mL F12-K with 10% FBS and incubated at 37°C with 5% CO<sub>2</sub>. 200 nM, 400 nM, 2 µM GLP-1 (1-37), or GLP-1(7-37) (Bachem, King of Prussia, PA), or 1X PBS were added separately into different wells. Following a 16 h incubation, an additional 1 mL F-12K with 10% FBS plus 200 nM, 400 nM, 2 µM GLP-1 (1-37), or GLP-1(7-37) was added to the cells, supplemented with 0.4% Glucose for an additional 2 h. The media was removed from the cells, supplemented with Leupeptin (10 ng/mL), 0.2 mM PMSF and aprotinin (10ng/mL), centrifuged (12,000 x rpm) (Effendorf 5804R, Westbury, NY ), and kept briefly at 4°C prior to ELISA analysis for insulin expression. Insulin was measured using Human Insulin ELISA kit (Millipore, MA) according to the manufacturer's instructions. To assay for GLP-1(1-37) or GLP-1(7-37), the GLP-1 ELISA Kit (Millipore, MA) was used according to the manufacturer's instructions.

**Rat Serum ELISA.** Rat serum was obtained from all rats in the study and assayed using standard ELISA kits (Millipore, MA) for GLP-1(7-37) for the presence of GLP-1 (either GLP-1(1-37) or GLP-1(7-37) according to the manufacturer's instructions. Standard curves were made for GLP-1(7-37) vs. GLP-1(1-37) in order to obtain an estimate of the concentrations for each.

**Detailed cloning for lactobacillus strains.** A plasmid was constructed for expressing *glp-1(1-37)* under control of the SlpA promoter (SLPAP) to make pFD-GLPL. The sequence GLPL (SLPAP-USP45-LEISS-HIS-EK-GLP(1-37)) was made synthetically (IDT, Coralville, IA). This fragment was inserted via high fidelity PCR (New England) into pBluescript-LacII (In which the LacII gene from Lactobacillus was subcloned into pBluescript-KS) to make pBluescript-GLPL. The resultant vector contained the sequence LGLPL (LacII upstream-GLPL-LacII downstream). LGLPL was PCR amplified and ligated into pORI28 plasmid (NCK1609) to make pORI28-LGLPL in EC1000. Plasmid pORI28-LGLPL was transformed into L containing pTRK669 (NCK 1391), grown in MRS with chloramphenicol 5 µg/ml (cam5). Transformants were selected on MRS plates with 5 µg/ml erythromycin and 5 µg/ml chloramphenicol. Colonies are visible after 24-72 h incubation at 37°C grown anaerobically. Transformants were screened for integration in MRS plates with 2 µg/ml erythromycin and 2 µg/ml chloramphenicol at 37°C overnight. Cultures were transferred (1% inoculum) 2-3 times in MRS with 2 µg/ml erythromycin only at 42°C. Cells were plated on MRS plates with 2 µg/ml erythromycin to obtain isolated colonies. Plates were incubated at 37°C anaerobically for 48 h. Replica plating was carried out on MRS with 2 µg/ml erythromycin and MRS with 5 µg/ml chloramphenicol to screen for chloramphenicol-sensitive colonies. Integration was verified in selected chloramphenicol sensitive colonies by PCR.

## SUPPLEMENTARY DATA

**RT-PCR.** Total RNA was isolated from the intestines of rats fed with LG or L and also from the pancreases and livers of healthy control rats and from IEC-6 cells using the RNAqueous<sup>®</sup> kit (Life Technologies, NY). cDNA was synthesized by SuperScript<sup>®</sup> III first-strand kit (Invitrogen, CA). The primers used for amplifying different genes as following.

*mafA*, (TCAACGACTTCGACCTGATG,GGGCAGAGTGATGATGGTG); *insulin 1* (AACCTAAGTGACCAGCTACAATCATAG, GCAGGCTTGGGCTCCC); *insulin 2* (TAAGTGACCAGCTACAGTCGG, GCTCCCCACACCAGGTAG); *hnf6* (GGCCTCCATGAATAACCTCTATAC, TCTTCCATCTGCCCTGAATTAC); *ngn3* (CCATCCAAGTGTCCCAAGAG, GAGTCAGTGCCCAAATGTAGT); *sox9* (TTCATGAAGATGACCGACGA, GTCCAGTCGTAGCCCTTCAG); *foxA2* (CCTTCATCCGCACCCTATTT, GGGAATAGAGGCTCTGGTAGTA); *pdx-1* (CTCCGGTTCTGCTGCGTAT, CACAGCTCTACAAGGACCCG); *glp-1R* (GGTGAAGGCGTGTATCTGT, AGATTAGCCTTCAGCTTGGCT); *insulin R* (AGAGGAACGACATTGCCCTG, TTTCGGGATGGCCTAGTGTC); *chrA* (TCAATCTCCAGGGGAGGACA, GGTCTGTGGAATCCCATGCT); *glucagon* (ATCAAAGACGCTGCCCTCAA, AACCAGTAGTAGTTGGCCGC); and  *$\beta$ -actin* (ACCCTAAGGCCAACCGTGAA, ACGCACGATTTCCCTCTCAG).

## SUPPLEMENTARY RESULTS

**Supplementary Figure 1. Bioassay for GLP-1(1-37) activity.** GL-1(7-37) and GLP-1(1-37) were applied to human enteric carcinomas (Caco-2 cells) and the amount of secreted insulin was measured. The amount of GLP-1 applied is on the abscissa and the insulin secreted is on the ordinate. Values are averages and errors bars represent 1 st. dev. ND=none detected. Ck=blank control.

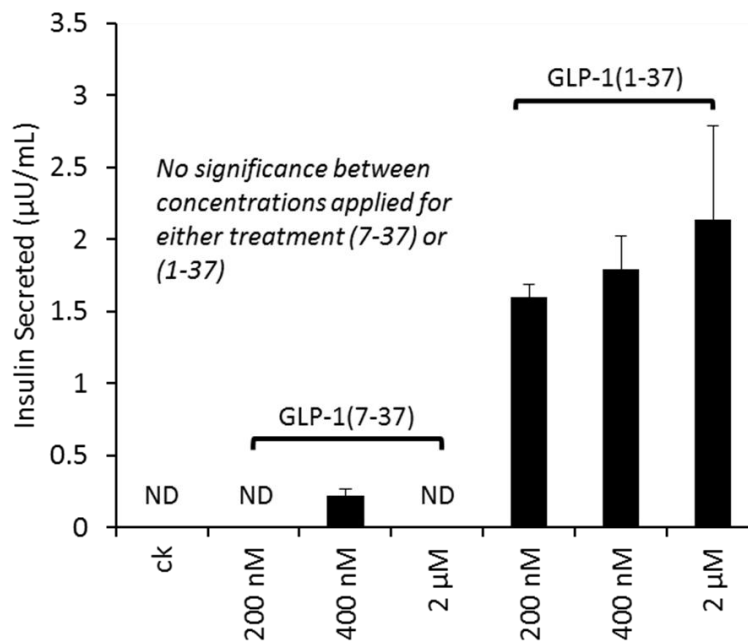

SUPPLEMENTARY DATA

**Supplementary Figure 2. ELISA for GLP-1(1-37).** Using a standard ELISA kit for GLP-1(7-37), an estimate for the amount of GLP-1(1-37) in both blood and assay buffer was determined. Shown here are **assay buffer** results. The amount of GLP-1(1-37) applied is on the abscissa and the estimate in GLP-1(7-37) equivalents is presented on the ordinate.

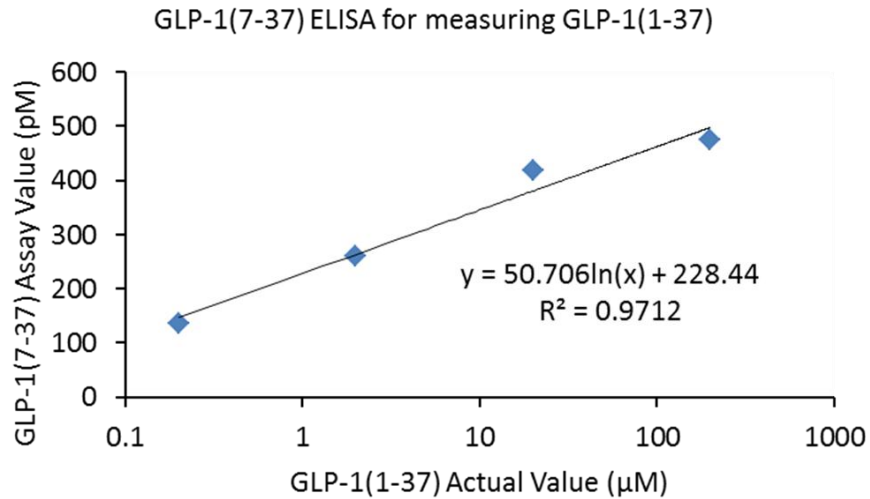

**Supplementary Figure 3. ELISA for GLP-1(1-37).** Using a standard ELISA kit for GLP-1(7-37), an estimate for the amount of GLP-1(1-37) in both blood and assay buffer was determined. Shown here are **blood** results. The amount of GLP-1(1-37) applied is on the abscissa and the estimate in GLP-1(7-37) equivalents is presented on the ordinate.

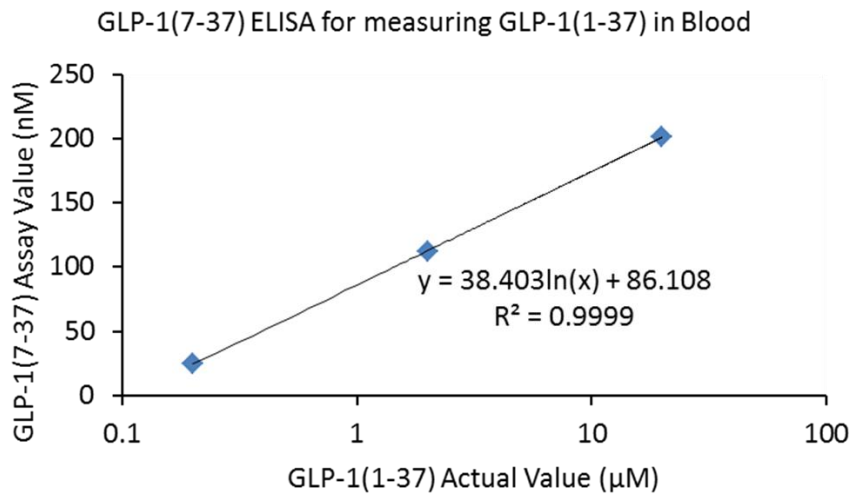

## SUPPLEMENTARY DATA

**Supplementary Figure 4. Blood levels of GLP-1.** Using a standard ELISA kit for GLP-1(7-37), an estimate for the amount of GLP-1(1-37) in blood of treated and control rats was measured. The levels of GLP-1 from the assay revealed no difference between any of the samples. Conversion to GLP-1(1-37) values were below the lowest point on the standard curve and extrapolation revealed no difference in that compound as well (data not shown).

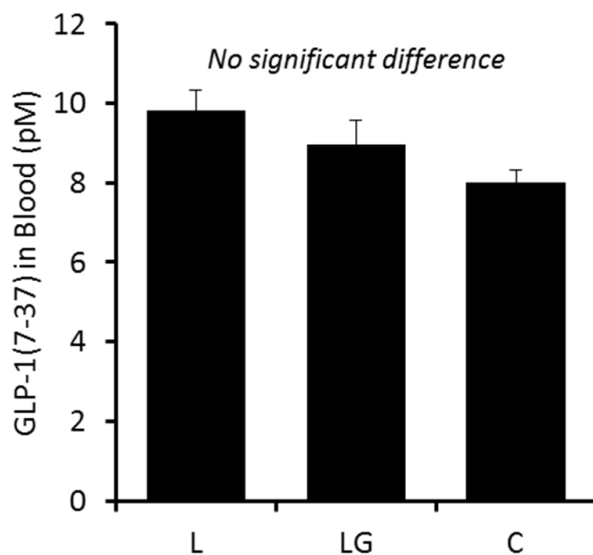

Supplement: supp_db14-0635_DB140635SupplementaryData.pdf [file supp_db14-0635_DB140635SupplementaryData.pdf]
